# Supplementary material
Source: publisher figshare collection journal article supplement (https://gsapubs.figshare.com/ndownloader/files/22740590)
Supplement: Supplementary file 1 [file 22740590]

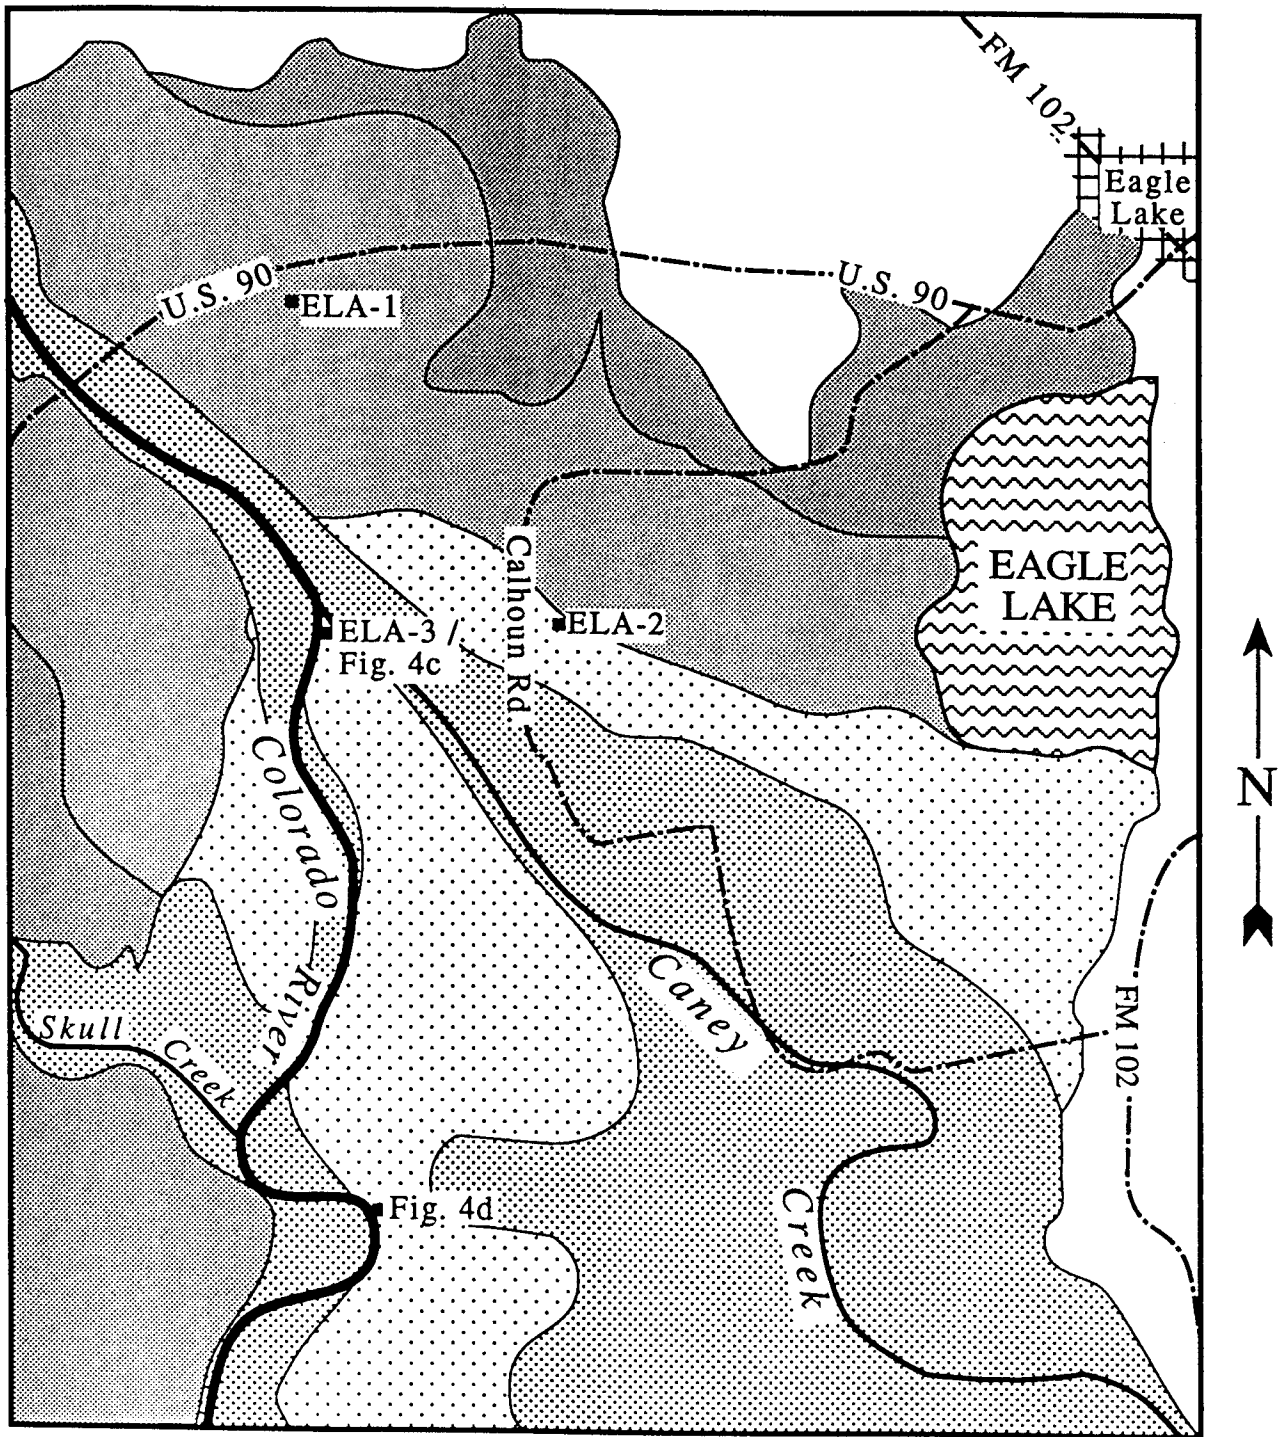

-  Columbus Bend Allomember 3
-  Columbus Bend Alloformation over Eagle Lake Alloformation
-  Eagle Lake Alloformation
-  Montopolis Terrace or Beaumont Formation
-  Lissie Formation

0 1 2 3  
Scale (km)

Figure A. Detailed map of Eagle Lake Alloformation type area, showing locations of measured sections included in data repository and main text. Map base USGS topographic maps of the Altair and Eagle Lake, Texas 7.5 minute quadrangles (scale 1:24,000).

### Key to Textures

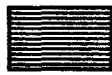

mud drapes

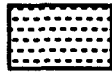

sandy mud

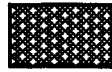

sandy loam / loamy sand

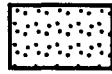

fine sandy / silty sand

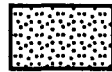

medium sand / coarse sand / gravelly sand

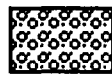

sandy gravel and gravel

### Key to Structures

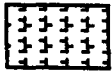

pedogenic structure

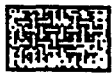

secondary CaCO<sub>3</sub>

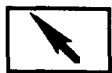

graded bedding

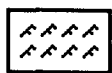

ripple-laminations

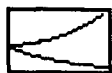

trough cross-strata

### Key to Boundaries

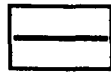

sharp

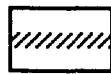

gradational

Figure B. Key to symbols used in measured sections, Figures C-E, and Figures G-L.

## MEASURED SECTION ELA 1

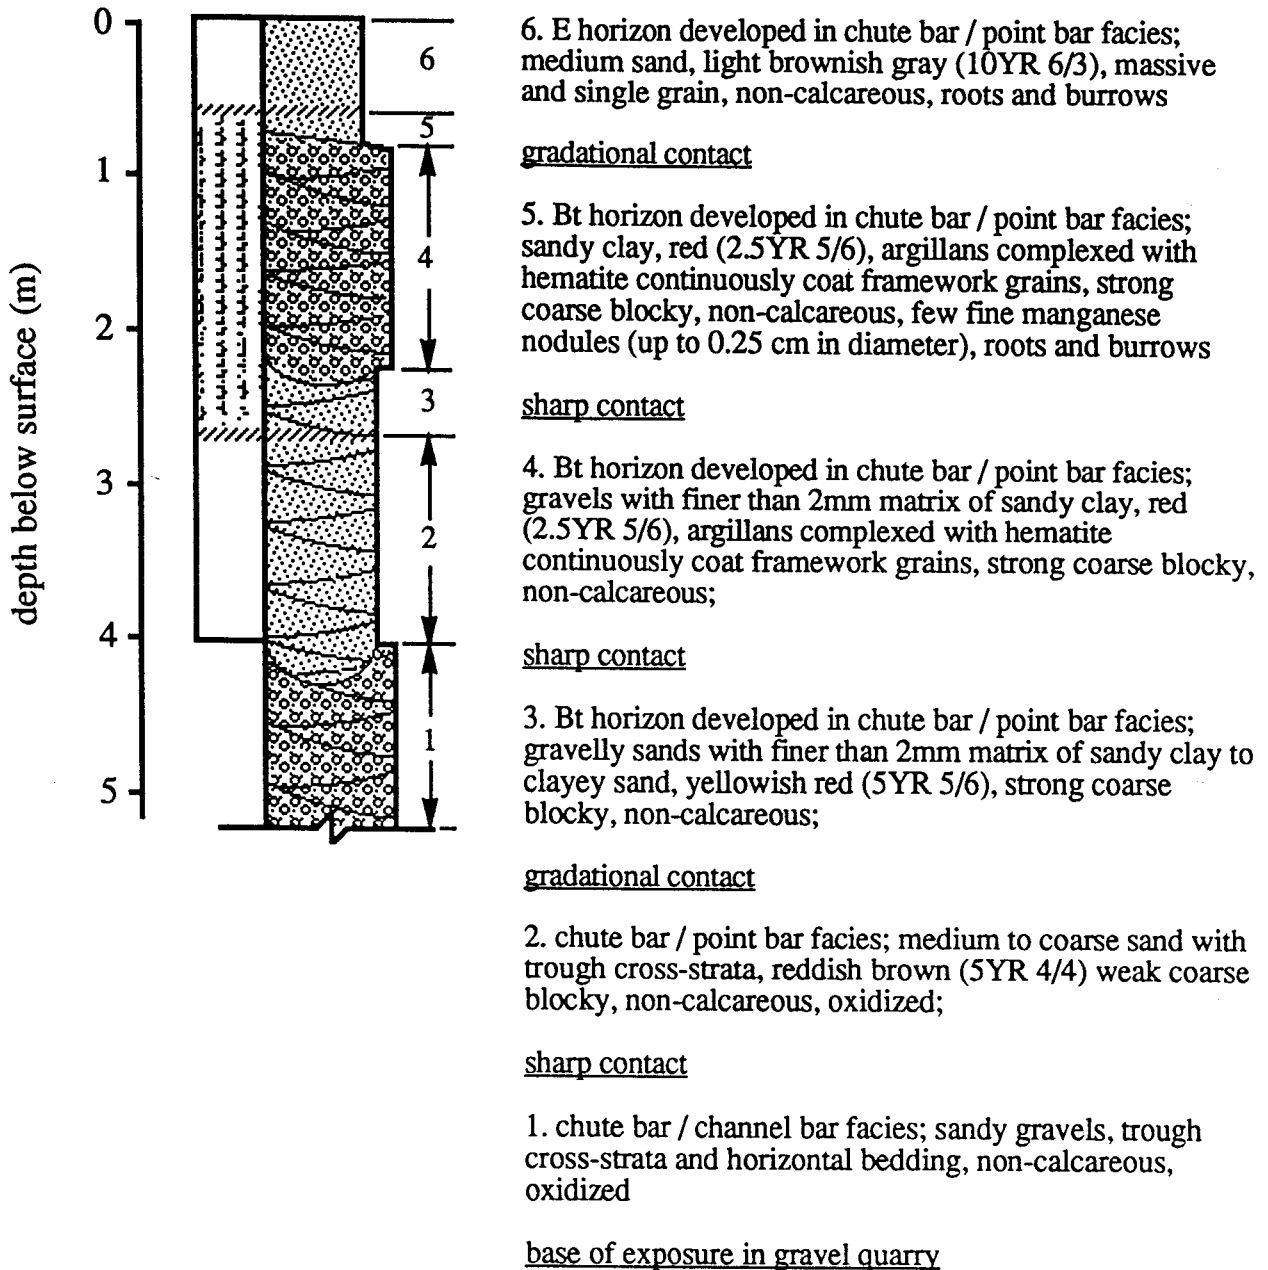

Figure C. Measured section ELA-1 (location shown in Figure A) at the type area near town of Eagle Lake, illustrating typical exposure of gravelly and sandy point bar facies, as well as upper boundary to ELA still exposed as terrace surface.

## MEASURED SECTION ELA 2

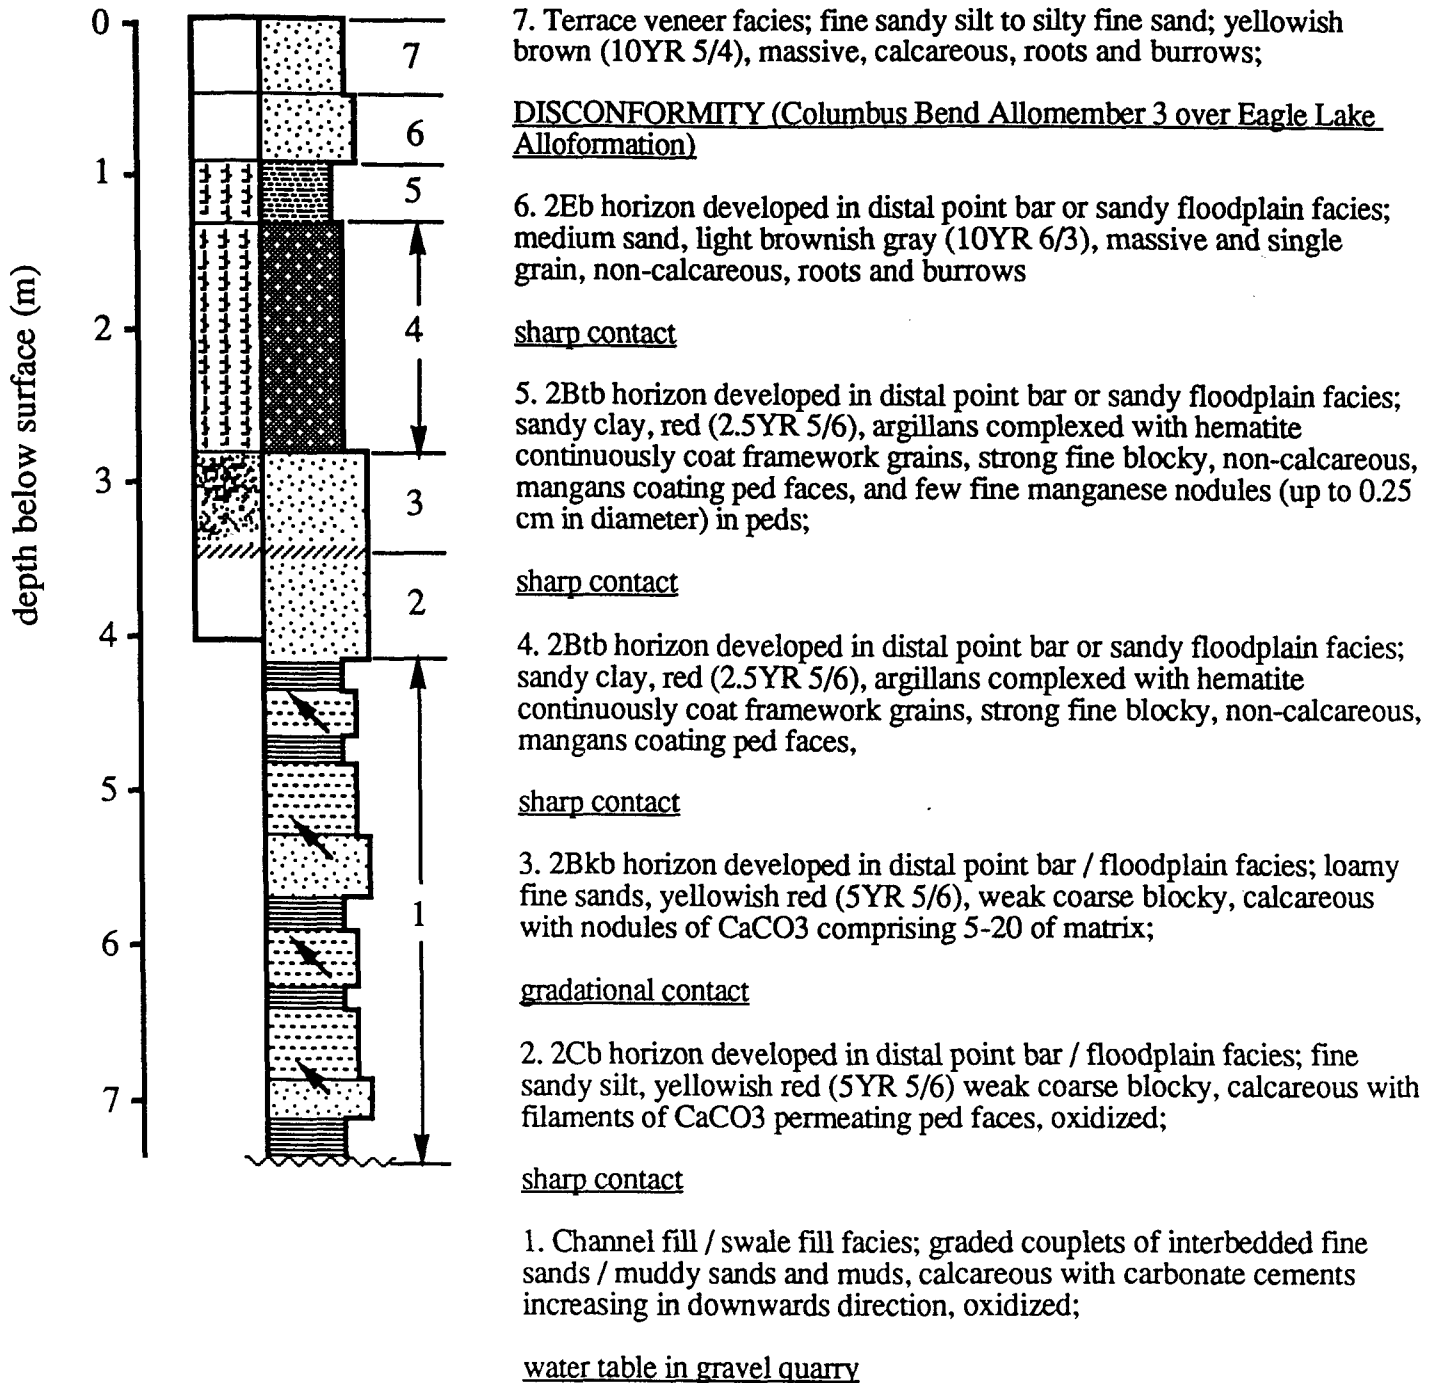

Figure D. Measured section ELA-2 (location shown in Figure A) at the type area near town of Eagle Lake, illustrating typical exposure of sandy point bar and floodplain facies overlying channel fill facies, as well as upper boundary to ELA buried by thin veneer from CBA-3.

## MEASURED SECTION ELA 3

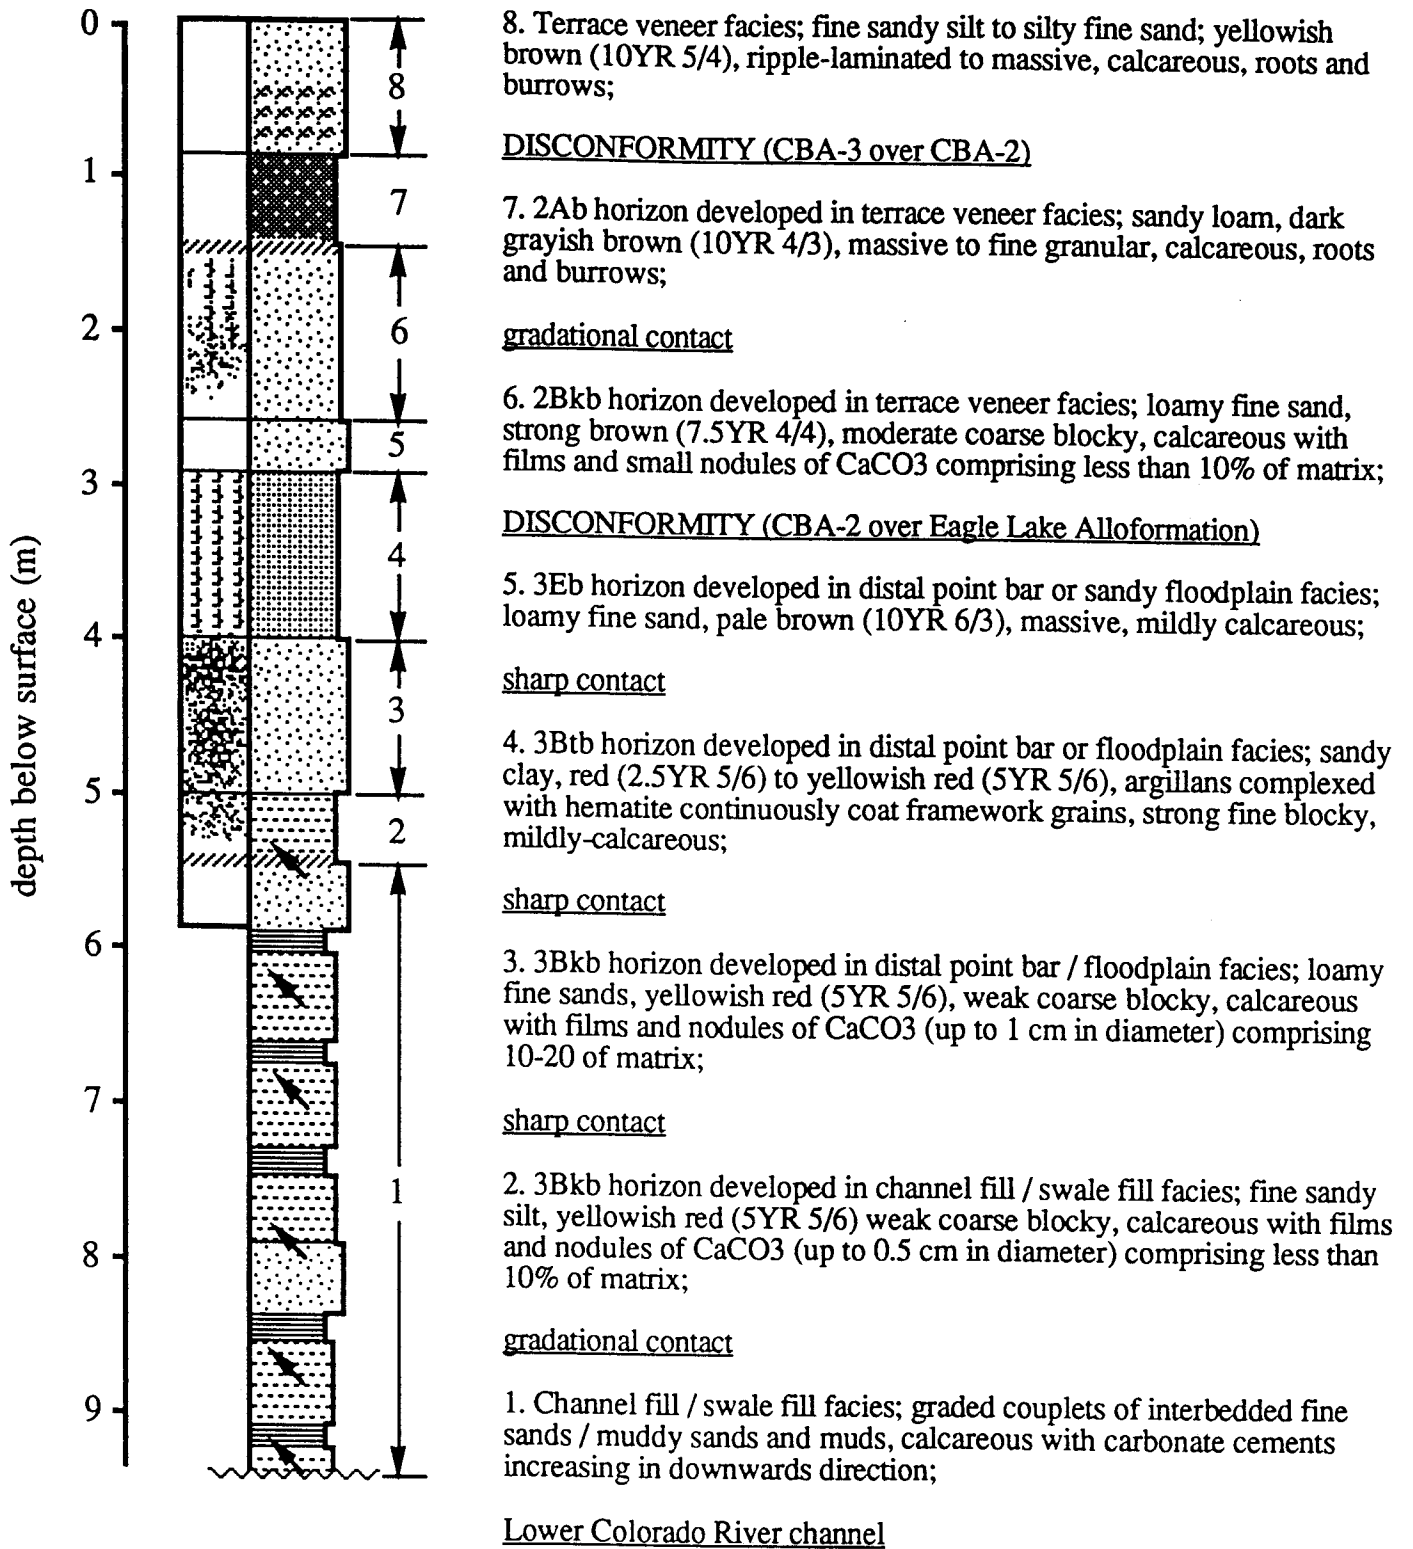

Figure E. Measured section ELA-3 (location shown in Figure A) at the type area near town of Eagle Lake, illustrating typical exposure of sandy point bar and floodplain facies overlying channel fill facies, as well as upper boundary to ELA buried by overbank facies from CBA-2 and a thin veneer from CBA-3.

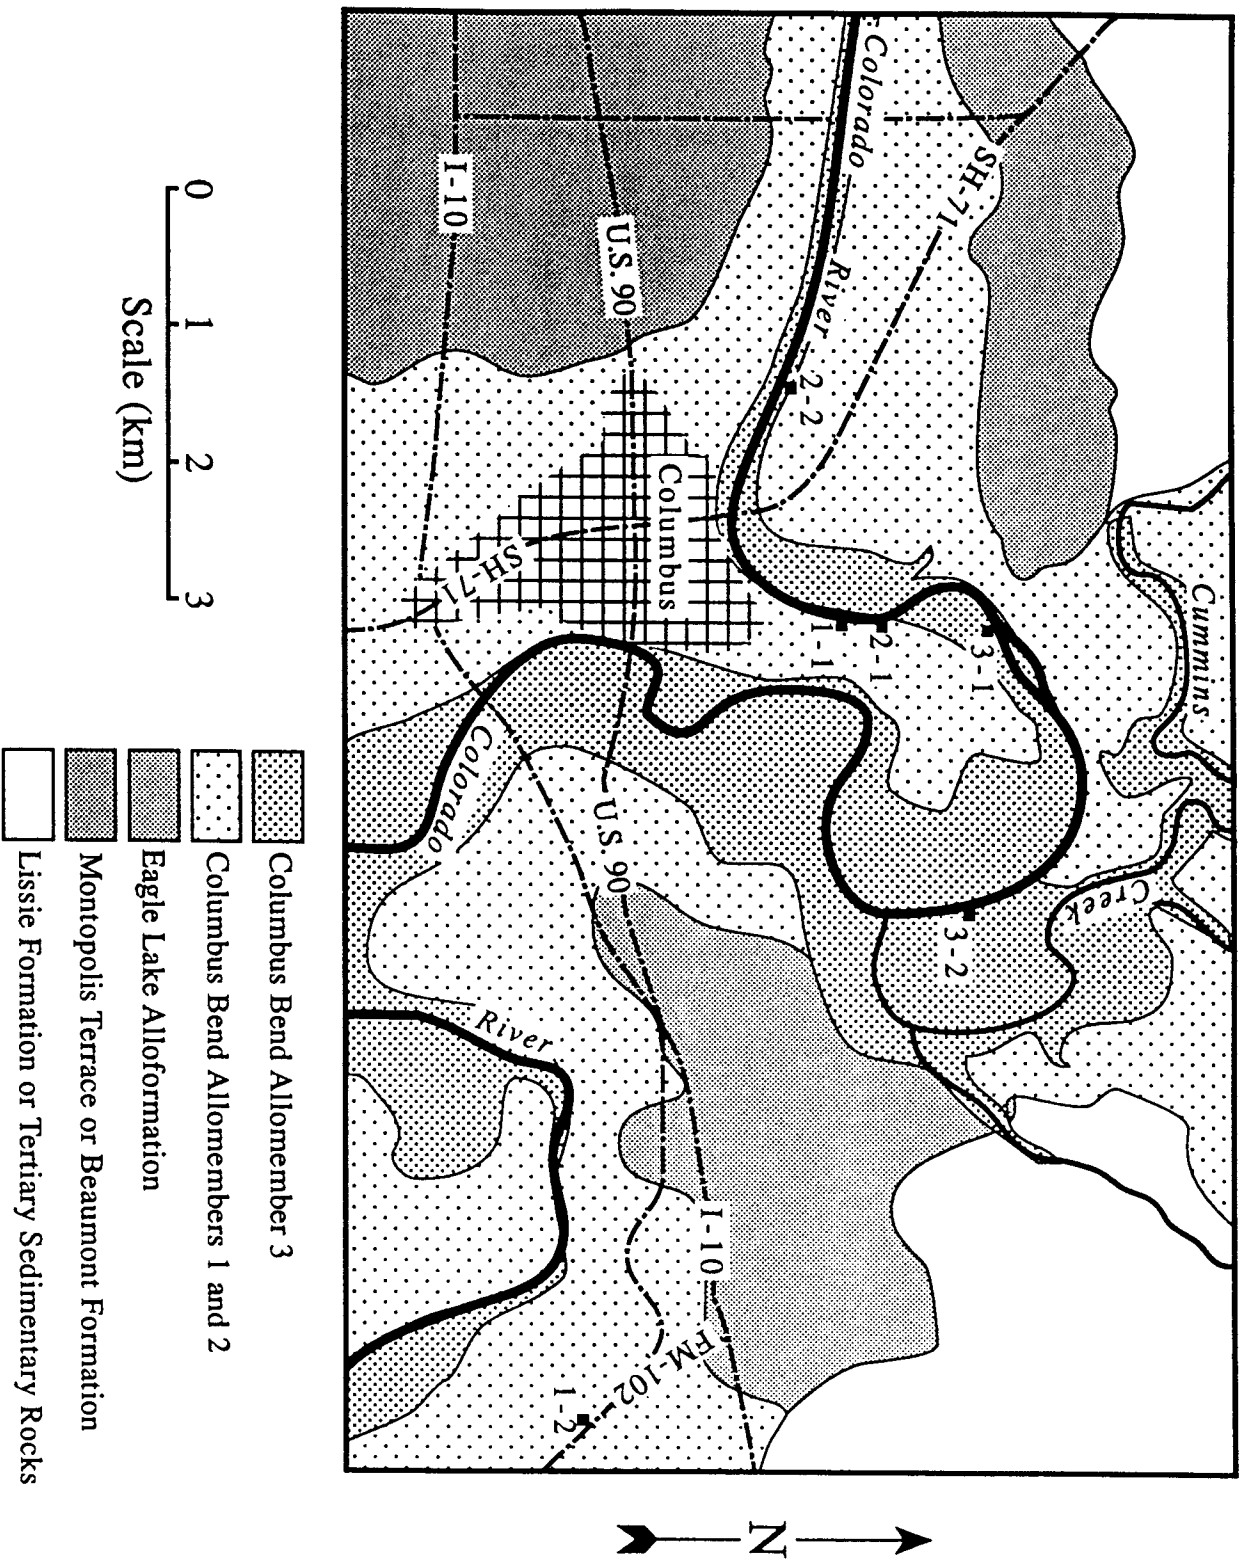

Figure F. Detailed map of Columbus Bend Alloformation type area, showing locations of measured sections included in data repository and main text. Map base USGS topographic maps of the Columbus, Texas 7.5 minute quadrangles (scale 1:24,000).

## MEASURED SECTION CBA-1-1

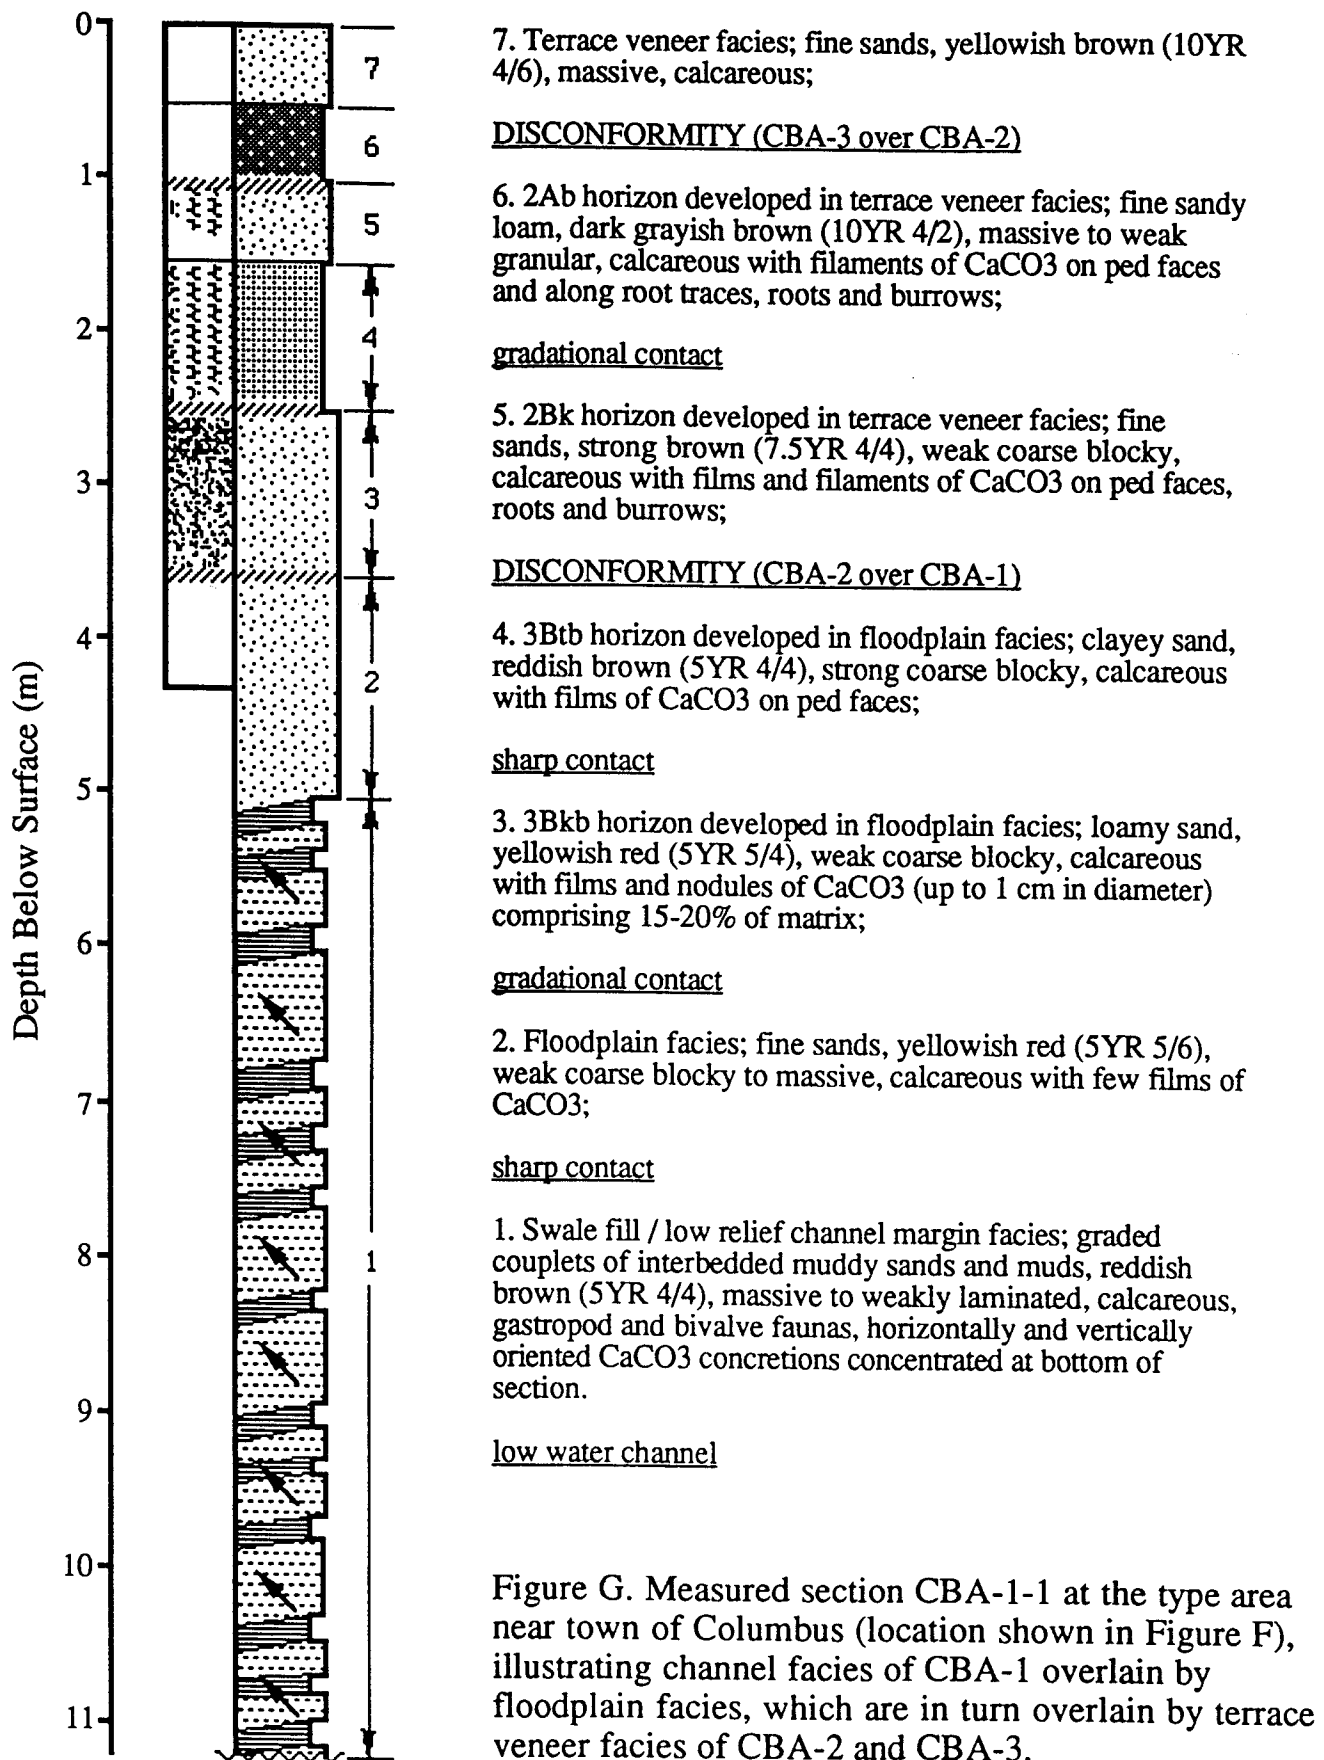

**MEASURED SECTION CBA-1-2**

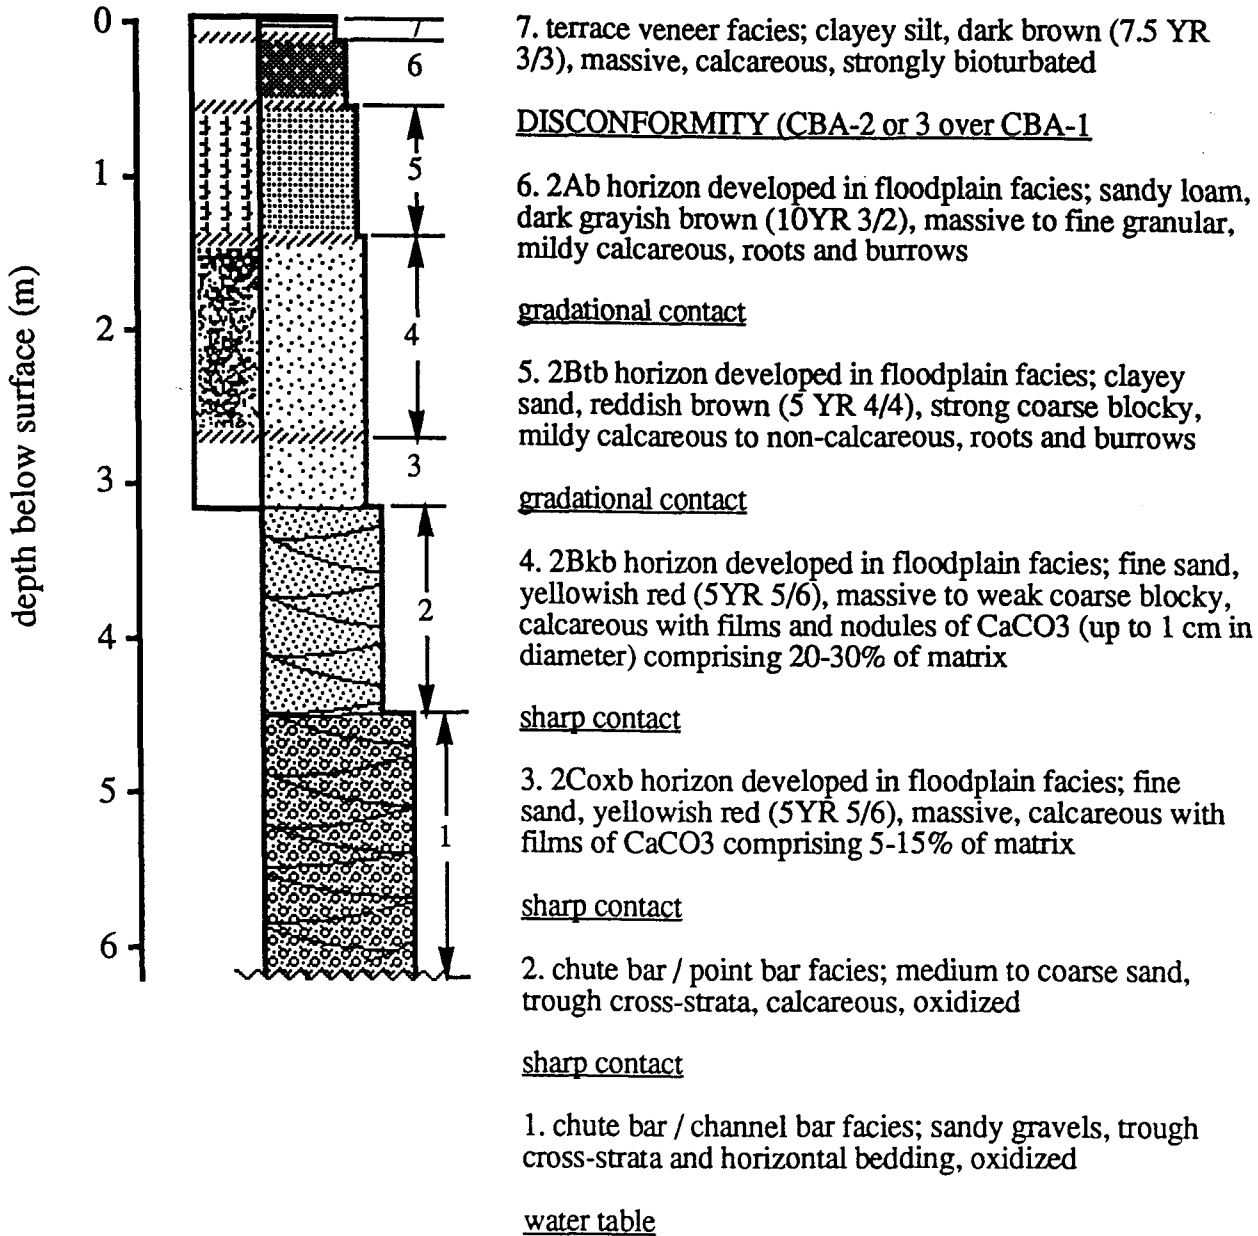

Figure H. Measured section CBA-1-2 at the type area near town of Columbus (location shown in Figure F), illustrating channel facies of CBA-1 overlain by floodplain facies, which are in turn overlain by very thin increment of terrace veneer facies from CBA-2 or CBA-3.



**MEASURED SECTION CBA-2-1**

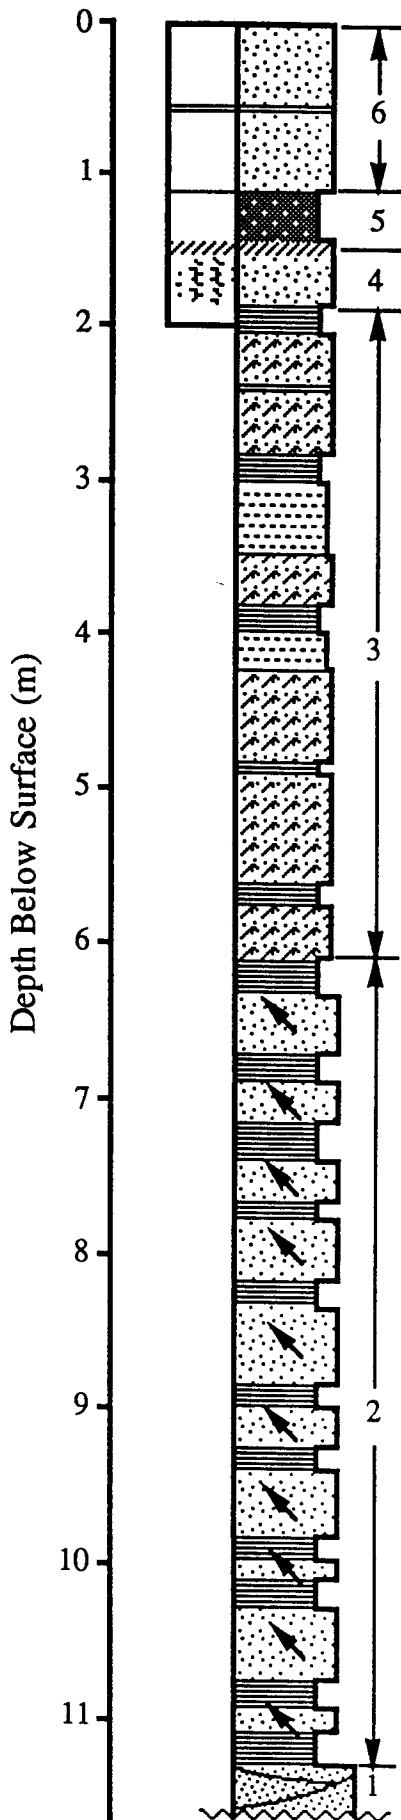

6. Terrace veneer facies; fine sands with few mud drapes, yellowish brown (10YR 4/6), massive, calcareous;

DISCONFORMITY (CBA-3 over CBA-2)

5. Truncated 2Ab horizon developed in floodplain facies; sandy loam, dark grayish brown (10YR 4/2) massive, calcareous, roots and burrows;

gradational contact

4. 2Bwb horizon developed in floodplain facies; loamy sand, strong brown (7.5YR 4/4), weak to moderate coarse blocky, calcareous with very few filaments and films of CaCO<sub>3</sub>, roots and burrows;

gradational contact

3. Floodplain facies; fine sands with ripple laminations interbedded with graded couplets of massive sandy mud and mud, calcareous, abundant gastropod fauna;

sharp contact

2. Low relief channel margin facies; graded couplets of fine sands and muds, mostly massive but with occasional ripple laminations;

1. Chute bar / channel bar facies; coarse sands, trough cross-strata.

low water channel

Figure I. Measured section CBA-2-1 at the type area near town of Columbus (location shown in Figure F), illustrating channel facies of CBA-2 overlain by floodplain facies, which are in turn overlain by terrace veneer facies from CBA-3.

**MEASURED SECTION CBA-2-2**

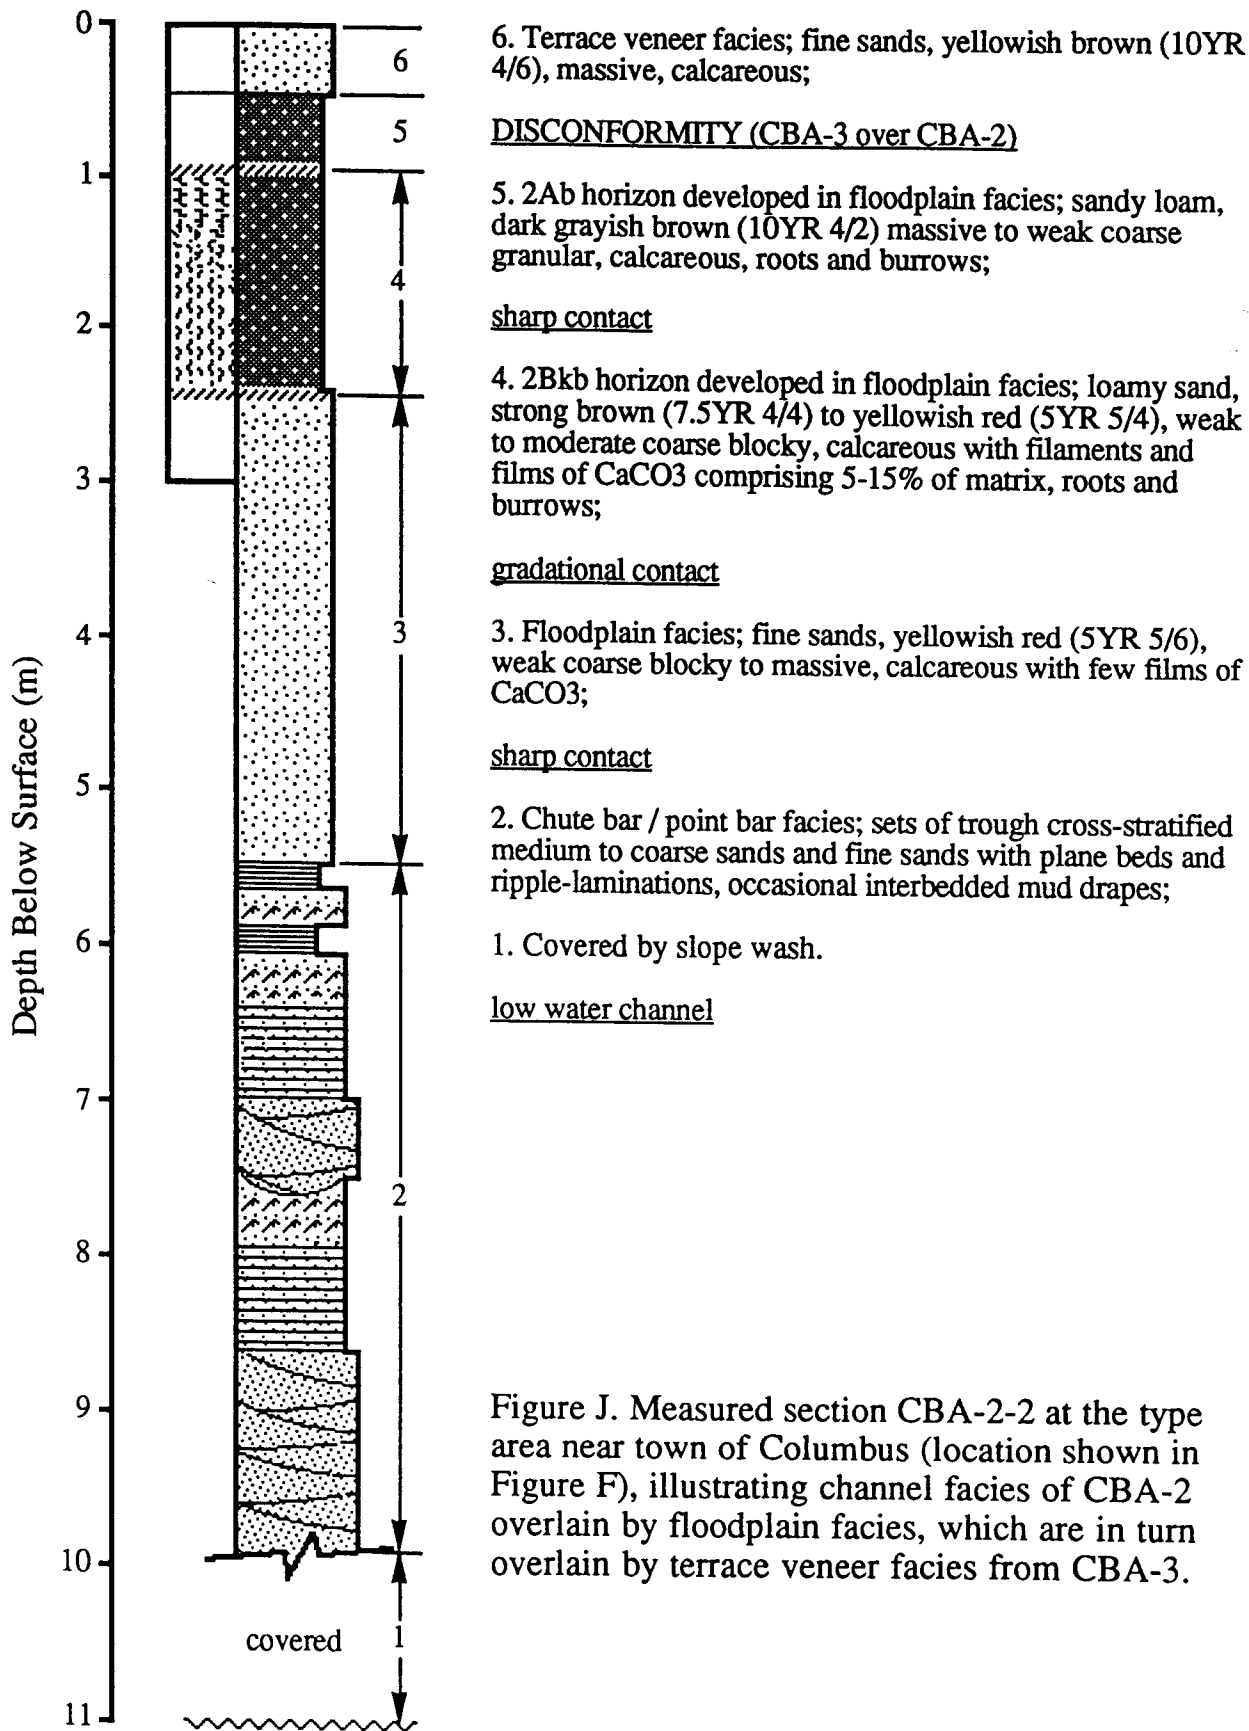

Figure J. Measured section CBA-2-2 at the type area near town of Columbus (location shown in Figure F), illustrating channel facies of CBA-2 overlain by floodplain facies, which are in turn overlain by terrace veneer facies from CBA-3.

## MEASURED SECTION CBA-3-1

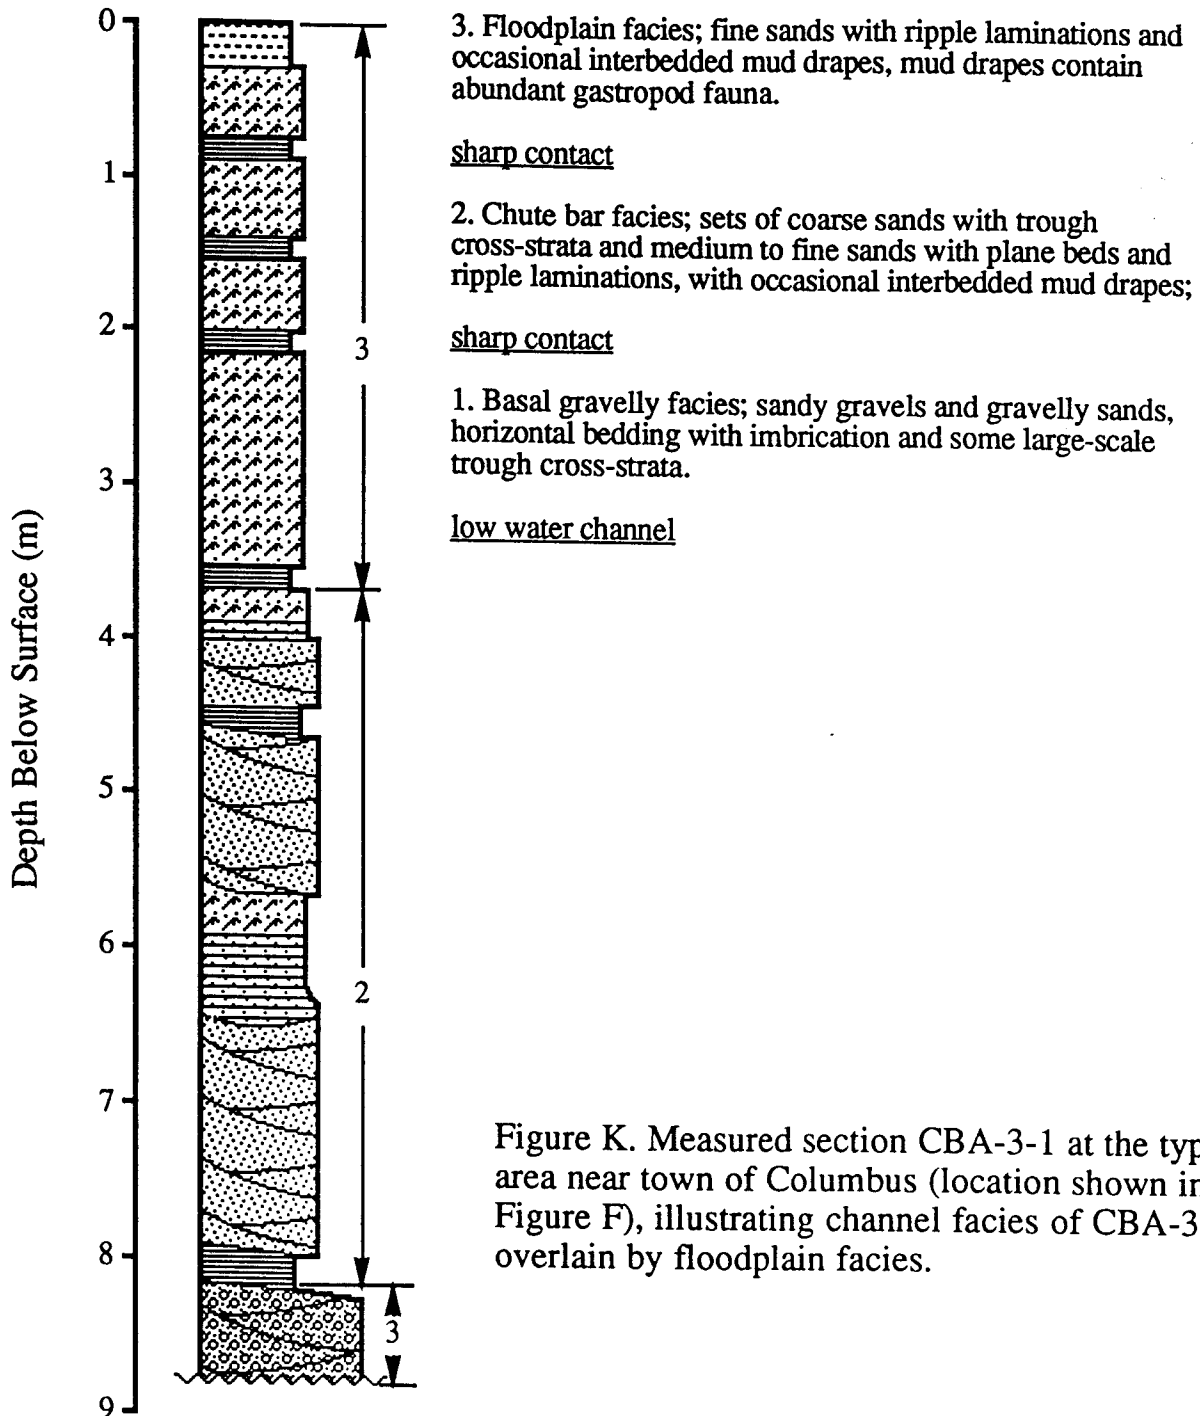

Figure K. Measured section CBA-3-1 at the type area near town of Columbus (location shown in Figure F), illustrating channel facies of CBA-3 overlain by floodplain facies.

**MEASURED SECTION CBA-3-2**

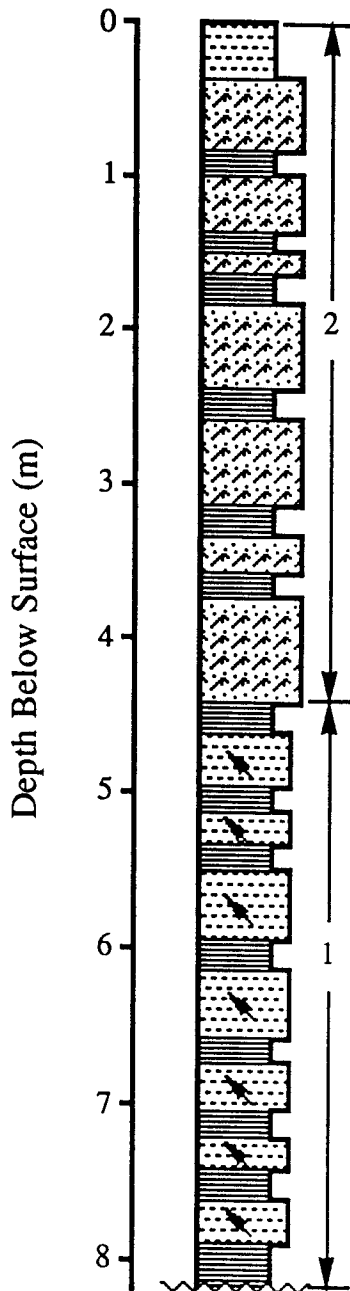

2. Floodplain facies; fine sands with ripple laminations and interbedded mud drapes, mud drapes contain abundant gastropod fauna.

sharp contact

1. Channel fill / swale fill facies; couplets of graded muddy sands and sandy muds with interbedded mud drapes, abundant gastropod fauna.

low water channel

Figure L. Measured section CBA-3-2 at the type area near town of Columbus (location shown in Figure F), illustrating channel facies of CBA-3 overlain by floodplain facies.
